# Supplementary material
Source: PubMed Central journal article supplement (PMC2939829)
Supplement: NIHMS213073-supplement-Supp_Fig_s1-s2__Table_s1-s2.pdf [file NIHMS213073-supplement-Supp_Fig_s1-s2__Table_s1-s2.pdf]

**Table S1. Bacterial strains and plasmids**

| <b>Bacteria</b>                | <b>Description</b>                                               | <b>Reference/Source</b>       |
|--------------------------------|------------------------------------------------------------------|-------------------------------|
| <i>V. cholerae</i> O395*       | Classical Ogawa, Sm <sup>R</sup>                                 | (Taylor <i>et al.</i> , 1987) |
| <i>V. cholerae</i> O395, pMT5  | pMT5:: <i>toxT</i>                                               | This study                    |
| <i>V. cholerae</i> C6706       | El Tor Inaba, Sm <sup>R</sup>                                    | (Hase <i>et al.</i> , 1994)   |
| <i>V. cholerae</i> C6706, pMT5 | pMT5:: <i>toxT</i>                                               | (DiRita <i>et al.</i> , 1996) |
| <i>V. cholerae</i> RT4340      | El Tor C6706 <i>tcpA</i> in classical O395                       | This study                    |
| <i>V. cholerae</i> RT4524      | <i>tcpA</i> :: <i>lacZ</i> , pMIN, Gm <sup>R</sup>               | This study                    |
| <i>V. cholerae</i> LC1         | TcpA A138E                                                       | This study                    |
| <i>V. cholerae</i> LC6         | TcpA K187T                                                       | This study                    |
| <i>V. cholerae</i> LC7         | TcpA A156D/E158A                                                 | This study                    |
| <i>V. cholerae</i> LC9         | TcpA A138E/A156D/E158A                                           | This study                    |
| <i>V. cholerae</i> LC10        | TcpA A138E/A156D/E158A/K172A                                     | This study                    |
| <i>V. cholerae</i> LC11        | TcpA A138E/A156D/E158A/K187T                                     | This study                    |
| <i>V. cholerae</i> LC12        | TcpA A156D/E158A/K172A/D175N                                     | This study                    |
| <i>V. cholerae</i> LC13        | TcpA A138E/A156D/E158A/K172A/D175N                               | This study                    |
| <i>V. cholerae</i> LC15        | TcpA A156D/E158A/K172A/D175N/K187T                               | This study                    |
| <i>V. cholerae</i> LC16        | TcpA A138E/A156D/E158A/K172A/D175N/K187T                         | This study                    |
| <i>V. cholerae</i> ML9         | TcpA D113A                                                       | This study                    |
| <i>V. cholerae</i> ML10        | TcpA C120A                                                       | This study                    |
| <i>V. cholerae</i> ML12        | TcpA D175N                                                       | This study                    |
| <i>V. cholerae</i> ML14        | TcpA K172A/D175N                                                 | This study                    |
| <i>V. cholerae</i> ML15        | TcpA A156D                                                       | This study                    |
| <i>V. cholerae</i> ML16        | TcpA A138E/A156D/E158A/K172A/K187T                               | This study                    |
| <i>V. cholerae</i> ML17        | TcpA E158A                                                       | This study                    |
| <i>V. cholerae</i> ML18        | TcpA K172A                                                       | This study                    |
| <i>V. cholerae</i> ML25        | LC16 with D156A                                                  | This study                    |
| <i>V. cholerae</i> ML28        | TcpA D113G                                                       | This study                    |
| <i>V. cholerae</i> CL101       | O395, pCTX-Knφ                                                   | (Kirn <i>et al.</i> , 2000)   |
| <i>E. coli</i> S17             | λpir                                                             | (Skorupski and Taylor, 1996)  |
| <i>E. coli</i> RT4024          | <i>E. coli</i> S17 with pTK1                                     | This study                    |
| <i>E. coli</i> KSK580          | X90 with pMT5                                                    | This study                    |
| <i>E. coli</i> KSK575          | MM294 with pRK2013, a helper plasmid for pMT5                    | (Figurski and Helinski, 1979) |
| pMT5                           | <i>toxT</i> , Ap <sup>R</sup>                                    | (DiRita <i>et al.</i> , 1996) |
| pTK1                           | pKAS32:: <i>tcpA</i> <sup>Cl</sup> - <i>rpsL</i> Ap <sup>R</sup> | (Kirn <i>et al.</i> , 2000)   |
| pMIN1                          | pACYC184 Gm <sup>R</sup> cassette                                | (Nye <i>et al.</i> , 2000)    |

\*All *tcpA* mutation strains are derived from *V. cholerae* O395 and carry pMT5, which has the *toxT* gene under control of the *lac* promoter.

**Table S2. Primers**

| <b>Primer</b>     | <b>Sequence</b>                                                                                                     |
|-------------------|---------------------------------------------------------------------------------------------------------------------|
| D113A             | F <sup>1</sup> : 5' GCATTTGCAATTTTCAGTGGCTGGTCTGACACAGGC<br>R <sup>2</sup> : 5' GCCTGTGTCAGACCAGCCACTGAAATTGCAAATGC |
| C120A             | F: 5' GGTCTGACACAGGCTCAAGCCAAGACACTTATTACCAG<br>R: 5' CTGGTAATAAGTGTCTTGGCTTGAGCCTGTGTCAGACC                        |
| D175N             | F: 5' TCGCTCCCGCTAGTAAGAATTTAAATCTAACGAACATCACTCACG<br>R: 5' CGTGAGTGATGTTTCGTTAGATTTAAATTCTTACTAGCGGGAGCGA         |
| K172A/D175N       | F: 5' TCGCTCCCGCTAGTGCGAATTTAAATCTAACGAACATCAC<br>R: 5' GTGATGTTTCGTTAGATTTAAATTCGCACTAGCGGGAGCGA                   |
| A156D             | F: 5' GAGAATTCTGCAGCAGACGCTGAGACAGGCGT<br>R: 5' ACGCCTGTCTCAGCGTCTGCTGCAGAATTCTC                                    |
| E158A             | F: 5' CTGCAGCAGCGGCTGCGACAGGCGTTGGTGT<br>R: 5' ACACCAACGCCTGTCGCAGC CGCTGCTGCAG                                     |
| K172A             | F: 5' TCGCTCCCGCTAGTGCGAATTTAGATCTAACG<br>R: 5' CGTTAGATCTAAATTCGCACTAGCGGGAGCGA                                    |
| D156A/E158A       | F: 5' TTGAGAATTCTGCAGCAGCGGCTGCGACAGGCGTTGG<br>R: 5' CCAACGCCTGTCGCAGCCGCTGCTGCAGAATTCTCAA                          |
| D113G             | F: 5' GCATTTGCAATTTTCAGTGGGTGGTCTGACACAGGC<br>R: 5' GCCTGTGTCAGACCACCCACTGAAATTGCAAATGC                             |
| A138E             | F: 5' ATATTGCAATCAAAGAAGGTGGCGCAGTAGC<br>R: 5' GCTACTGCGCCACCTTCTTTGATTGCAATAT                                      |
| K187T             | F: 5' GTTGAGAAATTATGTACAGGTACTGCTCCATTC<br>R: 5' GAATGGAGCAGTACCTGTACATAATTTCTCAAC                                  |
| A156D/E158A       | F: 5' GAGAATTCTGCAGCAGACGCTGCGACAGGCGTTGGTGTG<br>R: 5' CACACCAACG CCTGTCGCAG CGTCTGCTGC AGAATTCTC                   |
| Sequencing primer | F: 5' CGCATTTCCTTTAAACACGAGTAAAATG<br>R: 5' GCCCATTATTTAATGGGCAACGTT                                                |

<sup>1</sup>F, forward primer<sup>2</sup>R, reverse primer

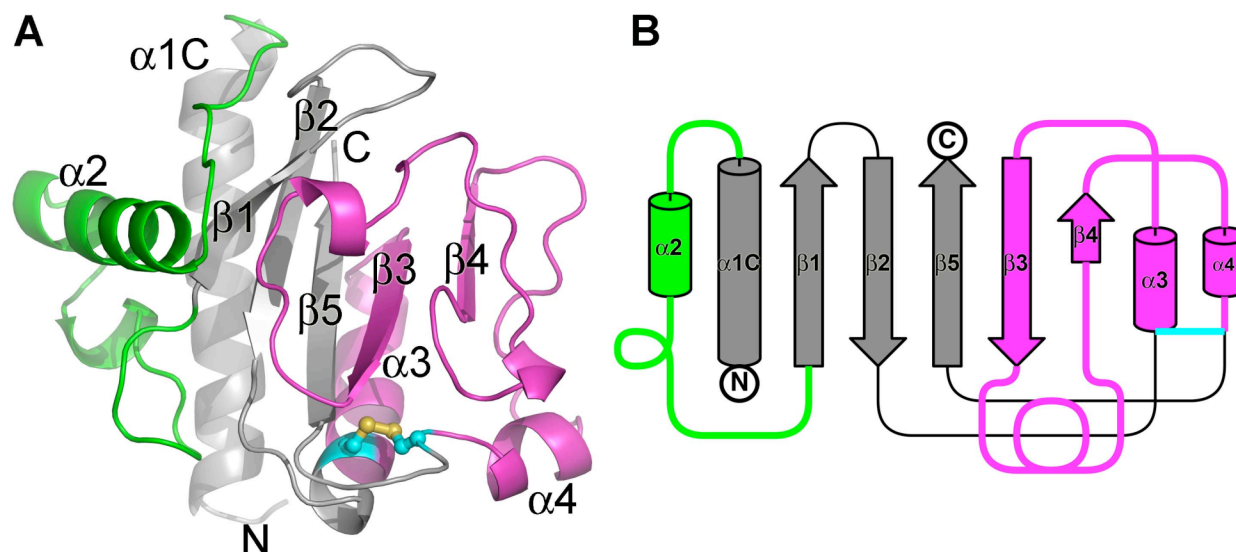

**Fig. S1. Atomic structure of the N-terminally-truncated El Tor Type IVb pilin,  $\Delta$ N-TcpA.**

$\Delta$ N-TcpA<sup>ET</sup> is a globular protein with an N-terminal  $\alpha$ -helical spine ( $\alpha$ 1C, residues 30-53) embedded in a twisted antiparallel  $\beta$ -sheet. This  $\alpha\beta$ -roll fold is seen in all the Type IV pilin structures solved to date, and is referred to as the conserved structural core of the pilin subunit (Craig *et al.*, 2004). TcpA<sup>ET</sup> has the canonical fold of the Type IVb pilin subclass, having a discontinuous, non-nearest-neighbor connectivity for the  $\beta$ -sheet, with the most C-terminal segment of the protein forming the central ( $\beta$ 5) strand. In TcpA<sup>ET</sup>, the  $\alpha\beta$ -loop (residues 54-93, shown in green), which lies between  $\alpha$ 1 and the  $\beta$ -sheet, forms one edge of the globular domain. The  $\alpha\beta$ -loop begins with an irregular loop followed by a four-turn  $\alpha$ -helix,  $\alpha$ 2, that lies at right angles to  $\alpha$ 1C. Following  $\alpha$ 2 there is a single helical turn then an irregular  $\beta$ -hairpin that feeds into the  $\beta$ -sheet at  $\beta$ 1. The polypeptide chain exits the  $\beta$ -sheet after the first two strands ( $\beta$ 1 and  $\beta$ 2) to form an  $\alpha$ -helix,  $\alpha$ 3, that runs under and parallel to the  $\beta$ -sheet then re-enters the  $\beta$ -sheet as its fourth strand (called  $\beta$ 3 since it follows  $\beta$ 2 in the polypeptide). The chain again leaves the sheet to form an irregular loop that winds around the front of the  $\beta$ -sheet then folds into a very short terminal strand ( $\beta$ 4) of the sheet. From there the chain follows another irregular loop that runs along the edge of the globular domain, forms a short  $\alpha$ -helix,  $\alpha$ 4, and then inserts into the  $\beta$ -sheet as the central strand ( $\beta$ 5), which is also the TcpA C-terminus. The D-region, which is the TcpA segment that spans the conserved, disulfide-bonded cysteines (C120 and C186, colored magenta) comprises a large portion of the globular domain and includes most of  $\alpha$ 3,  $\alpha$ 4, the irregular loop structures and the two terminal strands ( $\beta$ 3 and  $\beta$ 4) of the  $\beta$ -sheet. Thus, the  $\alpha\beta$ -loop and D-region form the edges and much of one face of the globular domain. These regions display a high degree of sequence and structural variation among the Type IV pilins and are implicated in a number of T4P functions (Craig *et al.*, 2004).

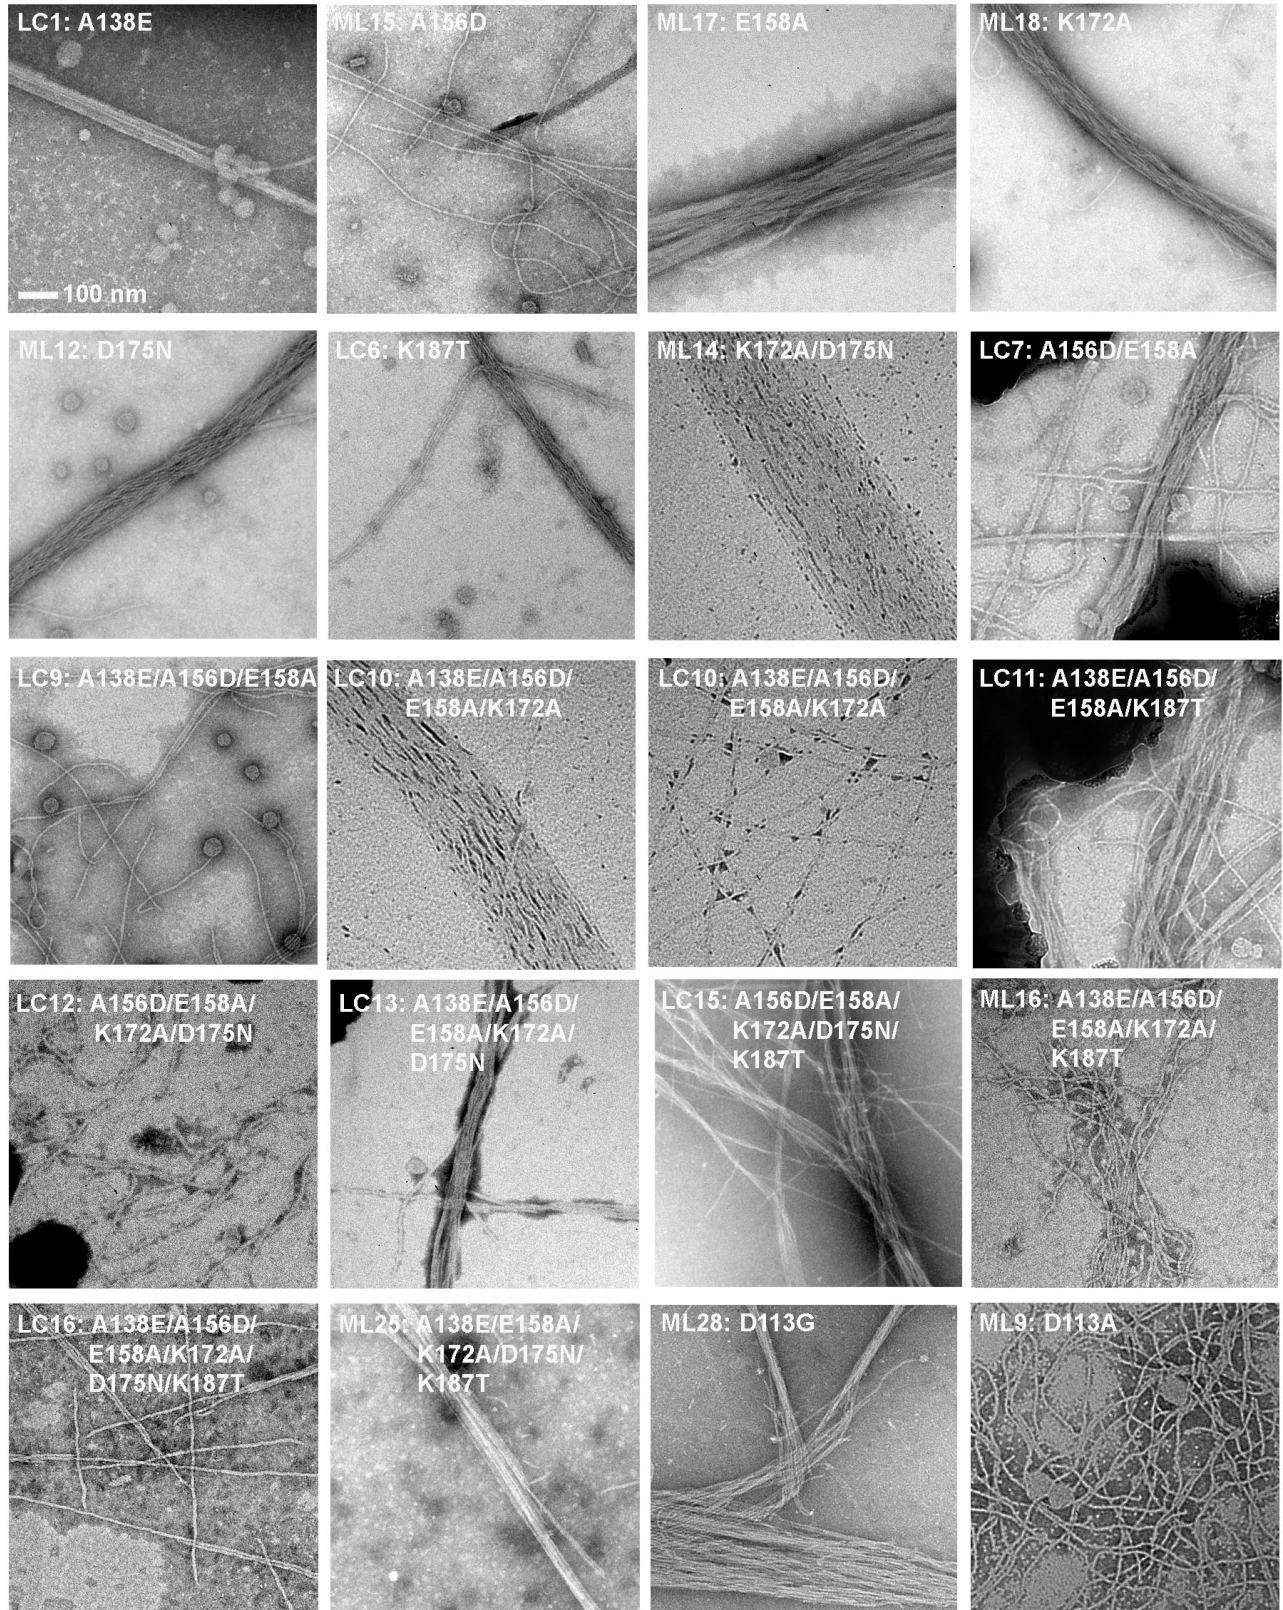

**Fig. S2. TEM images of TCP from whole cell cultures of classical-to-El Tor mutant *V. cholerae*. Scale bar for all panels, 100 nm.**

**REFERENCES**

- Craig, L., M. E. Pique and Tainer, J. A. (2004) Type IV pilus structure and bacterial pathogenicity. *Nat Rev Microbiol* **2**: 363-378.
- DiRita, V. J., M. Neely, R. K. Taylor and Bruss, P. M. (1996) Differential expression of the ToxR regulon in classical and E1 Tor biotypes of *Vibrio cholerae* is due to biotype-specific control over *toxT* expression. *Proc Natl Acad Sci U S A* **93**: 7991-7995.
- Figurski, D. H. and Helinski, D. R. (1979) Replication of an origin-containing derivative of plasmid RK2 dependent on a plasmid function provided in trans. *Proc Natl Acad Sci U S A* **76**: 1648-1652.
- Hase, C. C., L. S. Thai, M. Boesman-Finkelstein, V. L. Mar, W. N. Burnette, H. R. Kaslow, L. A., et al. (1994) Construction and characterization of recombinant *Vibrio cholerae* strains producing inactive cholera toxin analogs. *Infect Immun* **62**: 3051-3057.
- Kirn, T. J., M. J. Lafferty, C. M. Sandoe and Taylor, R. K. (2000) Delineation of pilin domains required for bacterial association into microcolonies and intestinal colonization by *Vibrio cholerae*. *Mol Microbiol* **35**: 896-910.
- Nye, M. B., J. D. Pfau, K. Skorupski and Taylor, R. K. (2000) *Vibrio cholerae* H-NS silences virulence gene expression at multiple steps in the ToxR regulatory cascade. *J Bacteriol* **182**: 4295-4303.
- Skorupski, K. and Taylor, R. K. (1996) Positive selection vectors for allelic exchange. *Gene* **169**: 47-52.
- Taylor, R. K., V. L. Miller, Furlong, D. B. and Mekalanos, J. J. (1987) Use of *phoA* gene fusions to identify a pilus colonization factor coordinately regulated with cholera toxin. *Proc Natl Acad Sci U S A* **84**: 2833-2837.
